# Supplementary material
Source: Springer Nature journal article supplement (https://www.springermedizin.de/resource/supplementary/12876_2008_307_MOESM5_ESM.pdf/9439126)

Review: Probiotics data only  
 Comparison: 01 Probiotics Vs control  
 Outcome: 05 flatulence dichotomous

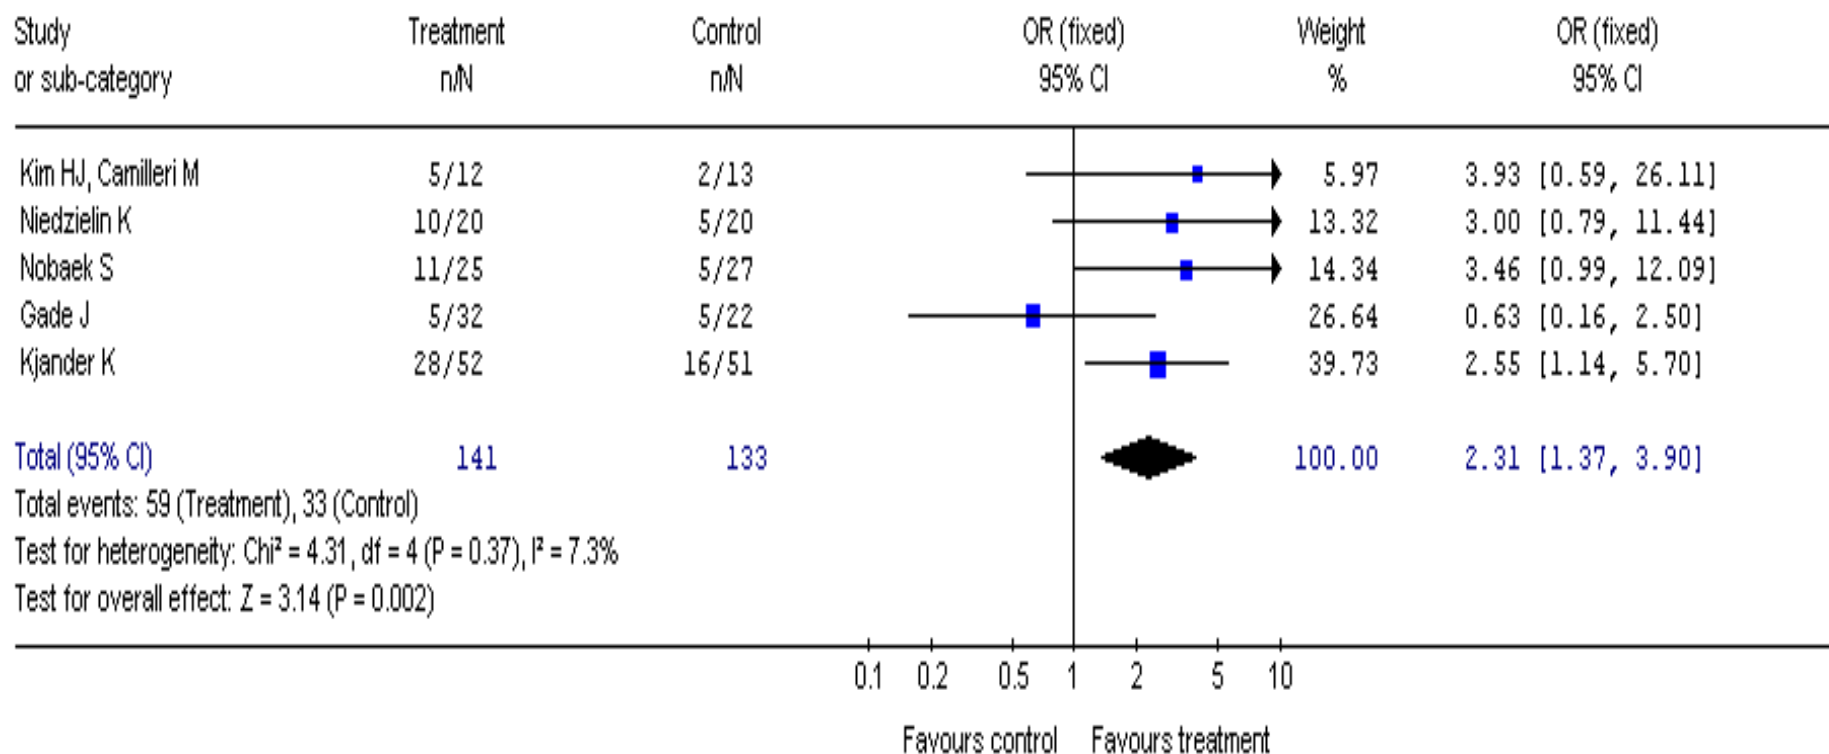

Supplement: MOESM5 [file 9439126]
